# Supplementary material for: Dicarboxylato platinum(ii) complexes containing dimethyl sulfoxide and triazolopyrimidine as potential anticancer agents: synthesis, structural and biological studies in solution
Source: Royal Society of Chemistry journal article supplement (doi:10.1039/c8nj01199k), 2018-01-01
Supplement: c8nj01199k1.pdf [file c8nj01199k1.pdf]

## Electronic Supplementary Information

# DICARBOXYLATO PLATINUM(II) COMPLEXES CONTAINING DIMETHYL SULFOXIDE AND TRIAZOLOPYRIMIDINE AS POTENTIAL ANTICANCER AGENTS: SYNTHESIS, STRUCTURAL AND BIOLOGICAL STUDIES IN A SOLUTION

Mateusz Jakubowski,<sup>a</sup> Iwona Łakomska,<sup>a1</sup> Jerzy Sitkowski,<sup>b,c</sup> Joanna

Wiśniewska<sup>a</sup>

<sup>a</sup> *Faculty of Chemistry, Nicolaus Copernicus University in Toruń, Gagarina 7, 87-100 Toruń, Poland*

<sup>b</sup> *National Institutes of Medicines, Chełmska 30/34, 00-725 Warszawa, Poland*

<sup>c</sup> *Institutes of Organic Chemistry, Polish Academic of Science, Kasprzaka 44/52, 01-224 Warszawa, Poland*

---

<sup>1</sup> Corresponding author, email: [iwolak@chem.umk.pl](mailto:iwolak@chem.umk.pl) (I. Łakomska)

## Table of contents

**Fig. S1** The  $^1\text{H}$  NMR spectrum of complex (3)  $[\text{Pt}(\text{mal})(\text{dmsO})(\text{dptp})]$

**Fig. S2** The 2D  $^1\text{H}$ - $^{13}\text{C}$  HSQC experiment for complex (3)  $[\text{Pt}(\text{mal})(\text{dmsO})(\text{dptp})]$

**Fig. S3** The 2D  $^1\text{H}$ - $^{15}\text{N}$  HMQC experiment for complex (3)  $[\text{Pt}(\text{mal})(\text{dmsO})(\text{dptp})]$

**Fig. S4** The  $^1\text{H}$  NMR spectrum of complex (4)  $[\text{Pt}(\text{CBDC})(\text{dmsO})(\text{dptp})]$

**Fig. S5** The 2D  $^1\text{H}$ - $^{13}\text{C}$  HSQC experiment for (4)  $[\text{Pt}(\text{CBDC})(\text{dmsO})(\text{dptp})]$

**Fig. S6** The 2D  $^1\text{H}$ - $^{15}\text{N}$  HMQC experiment for complex (4)  $[\text{Pt}(\text{CBDC})(\text{dmsO})(\text{dptp})]$
