# Supplementary figures and images for: Dicarboxylato platinum(ii) complexes containing dimethyl sulfoxide and triazolopyrimidine as potential anticancer agents: synthesis, structural and biological studies in solution
Source: Royal Society of Chemistry journal article supplement (doi:10.1039/c8nj01199k), 2018-01-01

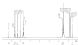

Supplement: c8nj01199k2.pdf [file c8nj01199k2.pdf]

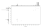

Supplement: c8nj01199k3.pdf [file c8nj01199k3.pdf]

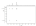

Supplement: c8nj01199k4.pdf [file c8nj01199k4.pdf]

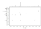

Supplement: c8nj01199k7.pdf [file c8nj01199k7.pdf]
